# Supplementary material
Source: MDPI journal article supplement (https://www.mdpi.com/2079-6412/11/11/1334)
Supplement: s1 [file s1]

## Article

# The Life of a Painting as Traced by Technical Analysis: Original Materials and Posthumous Alterations in Édouard Manet's *Woman in Striped Dress*

Federica Pozzi <sup>1,\*</sup>, Silvia A. Centeno <sup>1</sup>, Federico Carò <sup>1</sup>, Gillian McMillan <sup>2</sup>, Lena Stringari <sup>2</sup> and Vivien Greene <sup>3</sup>

<sup>1</sup> Department of Scientific Research, The Metropolitan Museum of Art, 1000 Fifth Avenue, New York, NY 10028, USA; silvia.centeno@metmuseum.org (S.A.C.); federico.carò@metmuseum.org (F.C.)

<sup>2</sup> Conservation Department, Solomon R. Guggenheim Museum, 1071 Fifth Avenue, New York, NY 10128, USA; gmcmillan@guggenheim.org (G.M.); lstringari@guggenheim.org (L.S.)

<sup>3</sup> Curatorial Department, Solomon R. Guggenheim Museum, 1071 Fifth Avenue, New York, NY 10128, USA; vgreene@guggenheim.org (V.G.)

\* Correspondence: federica.pozzi@centrorestaurovenaria.it (F.P.)

† Current address: Center for Conservation and Restoration of Cultural Heritage "La Venaria Reale", Via XX Settembre 18, 10078 Venaria Reale (Torino), Italy

**Citation:** Pozzi, F.; Centeno, S.A.; Carò, F.; McMillan, G.; Stringari, L.; Greene, V. The Life of a Painting as Traced by Technical Analysis: Original Materials and Posthumous Alterations in Édouard Manet's *Woman in Striped Dress*. *Coatings* **2021**, *11*, 1314. <https://doi.org/10.3390/coatings11111334>

Academic Editor: Maurizio Licchelli

Received: 23 September 2021

Accepted: 26 October 2021

Published: 30 October 2021

**Publisher's Note:** MDPI stays neutral with regard to jurisdictional claims in published maps and institutional affiliations.

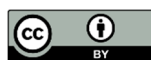

**Copyright:** © 2021 by the authors. Licensee MDPI, Basel, Switzerland. This article is an open access article distributed under the terms and conditions of the Creative Commons Attribution (CC BY) license (<http://creativecommons.org/licenses/by/4.0/>).

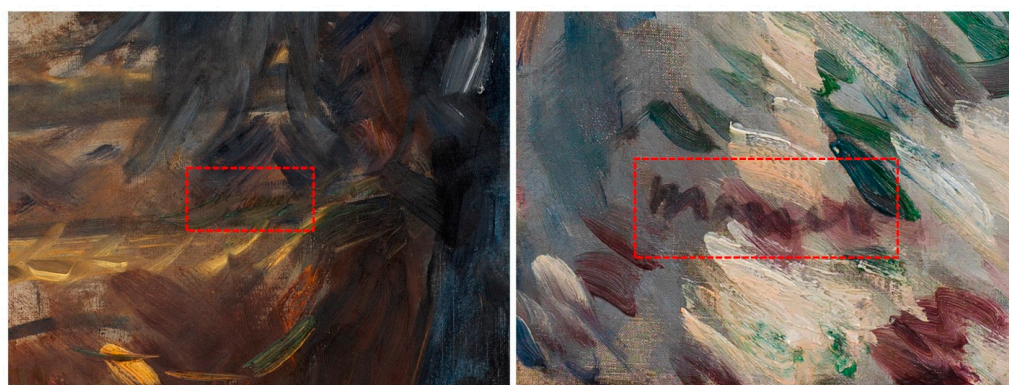

**Figure S1.** Inscription found on *Woman in Striped Dress* (left) compared to Manet's signature on *Before the Mirror* (right).

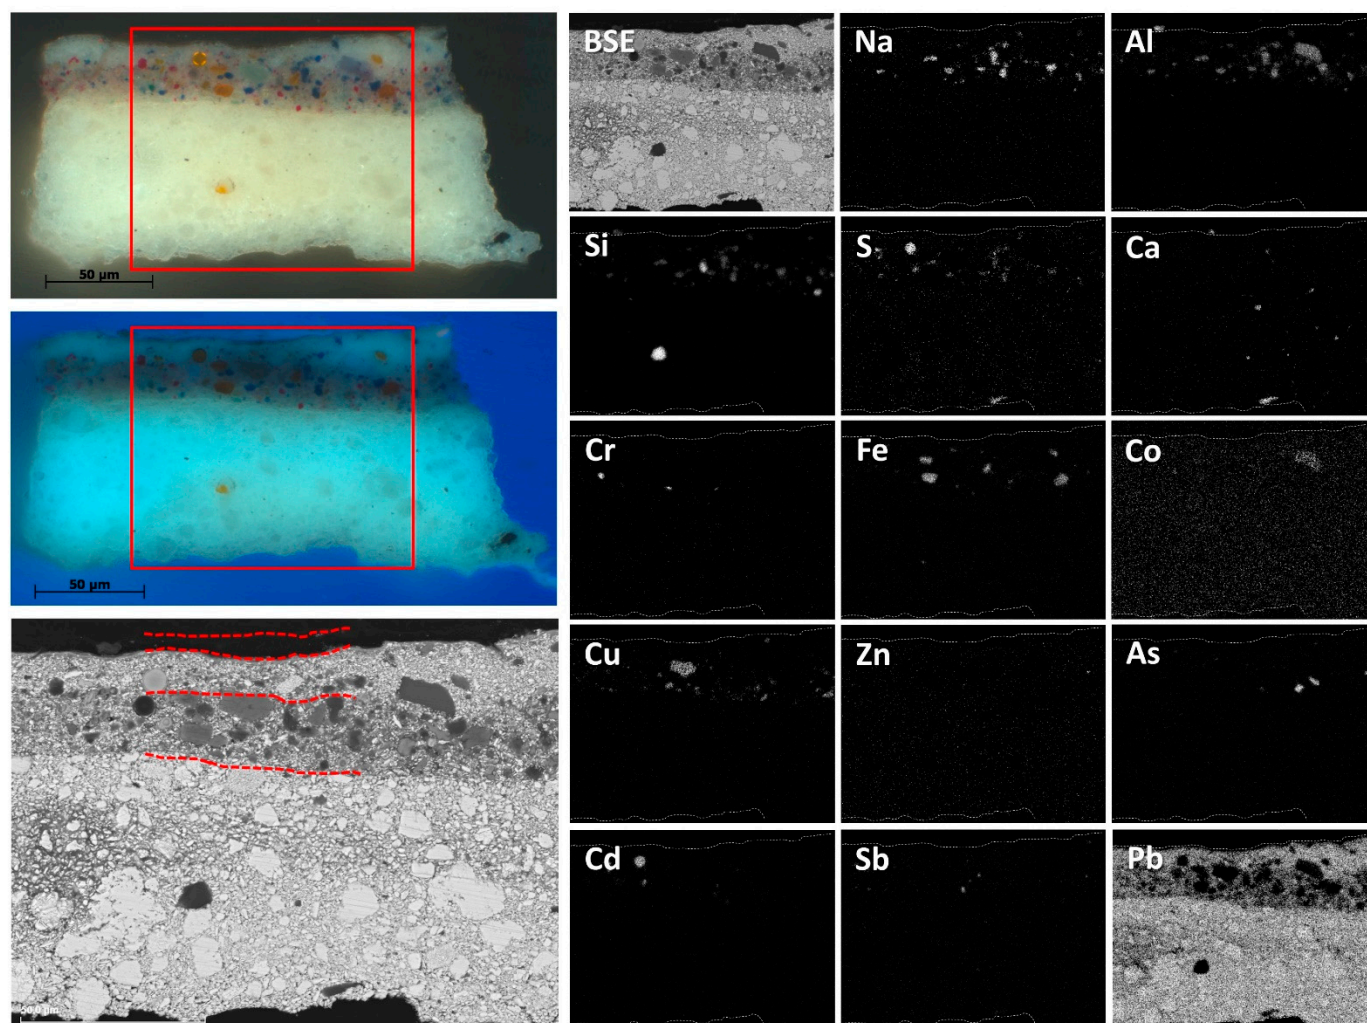

**Figure S2.** Optical microscopy and SEM/EDS data acquired on cross section S9.



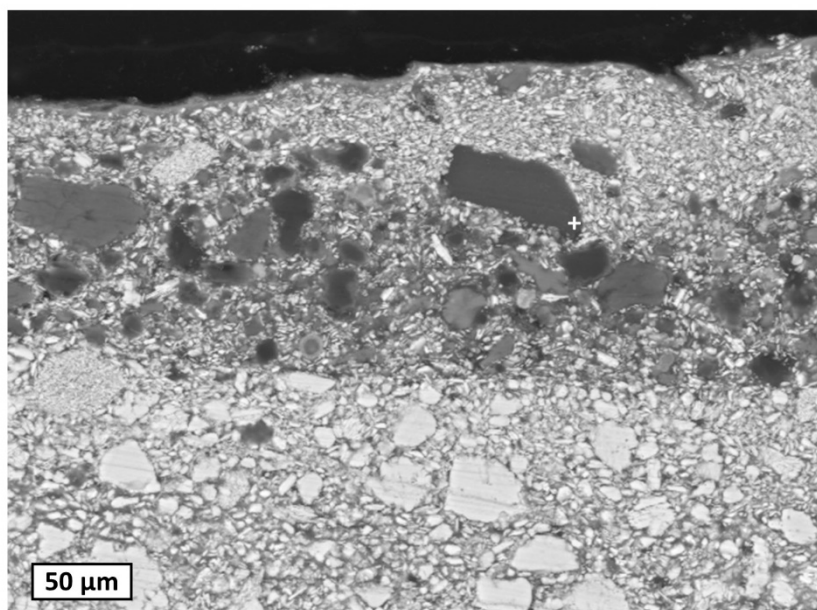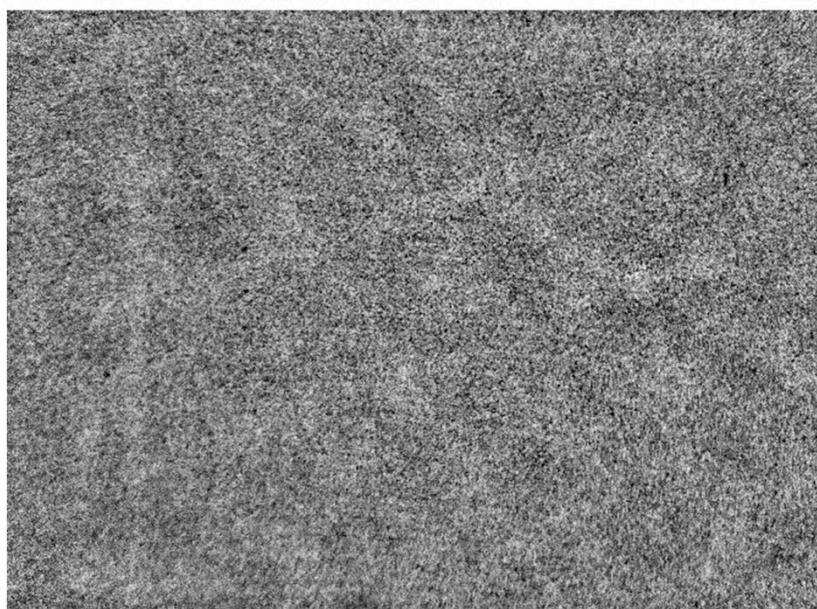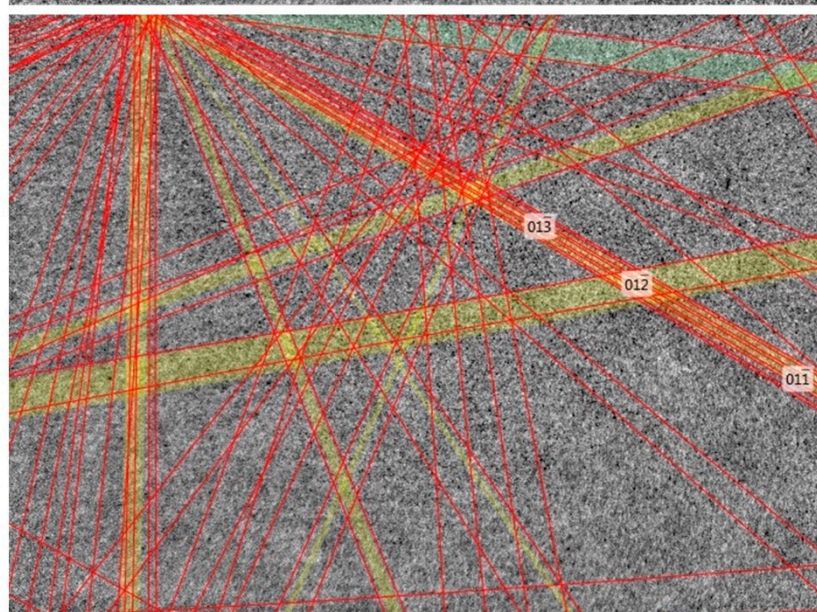



**Figure S3.** EBSD data acquired on cross section S9.

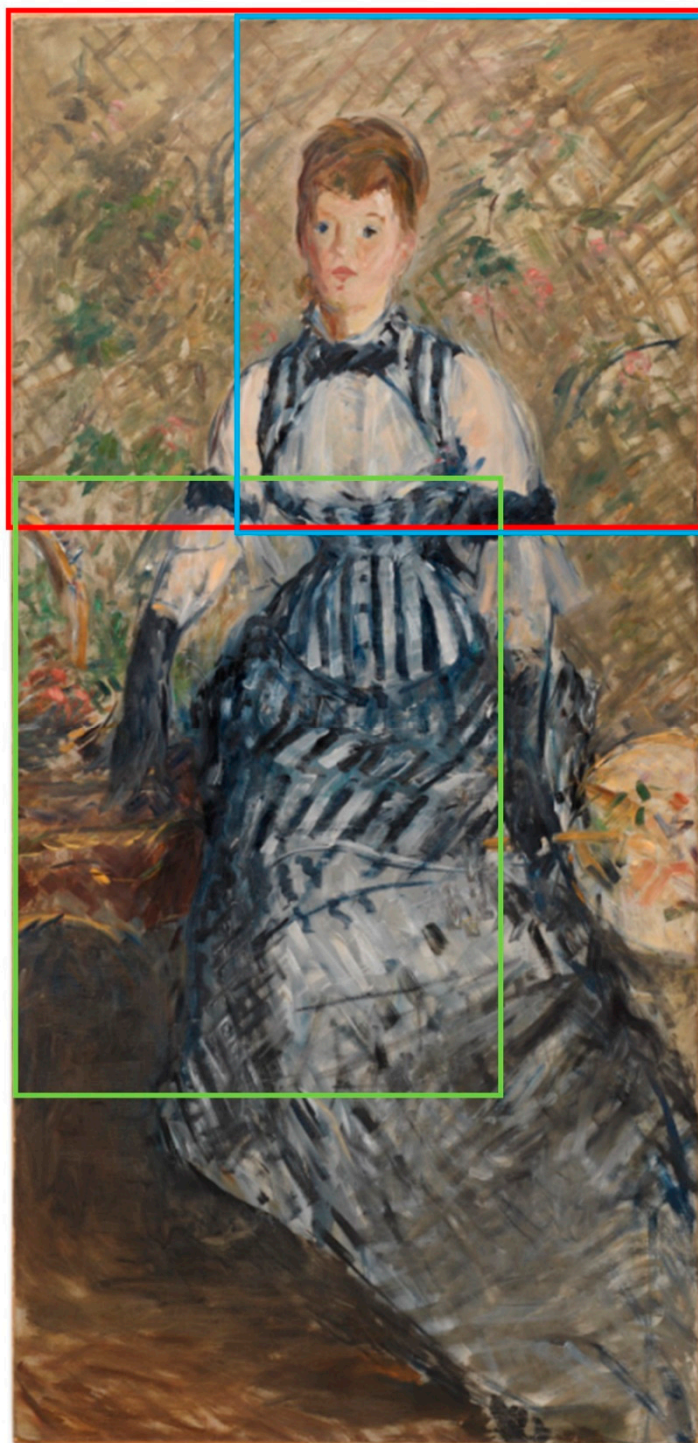

**Figure S4.** Areas of the painting where the MA-XRF elemental distribution maps shown in Figures 7 and 8 were acquired.

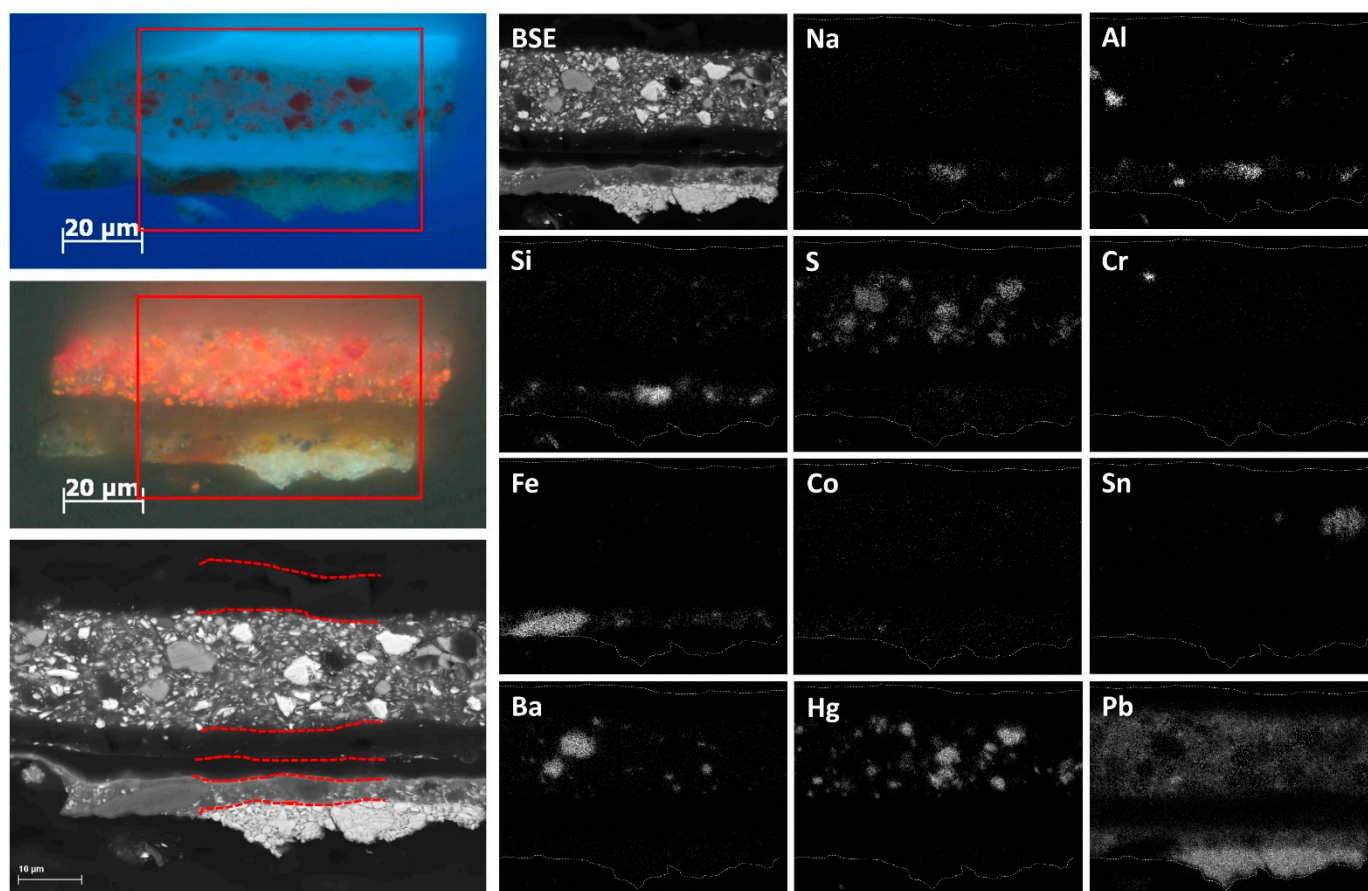

**Figure S5.** Optical microscopy and SEM/EDS data acquired on cross section S12.



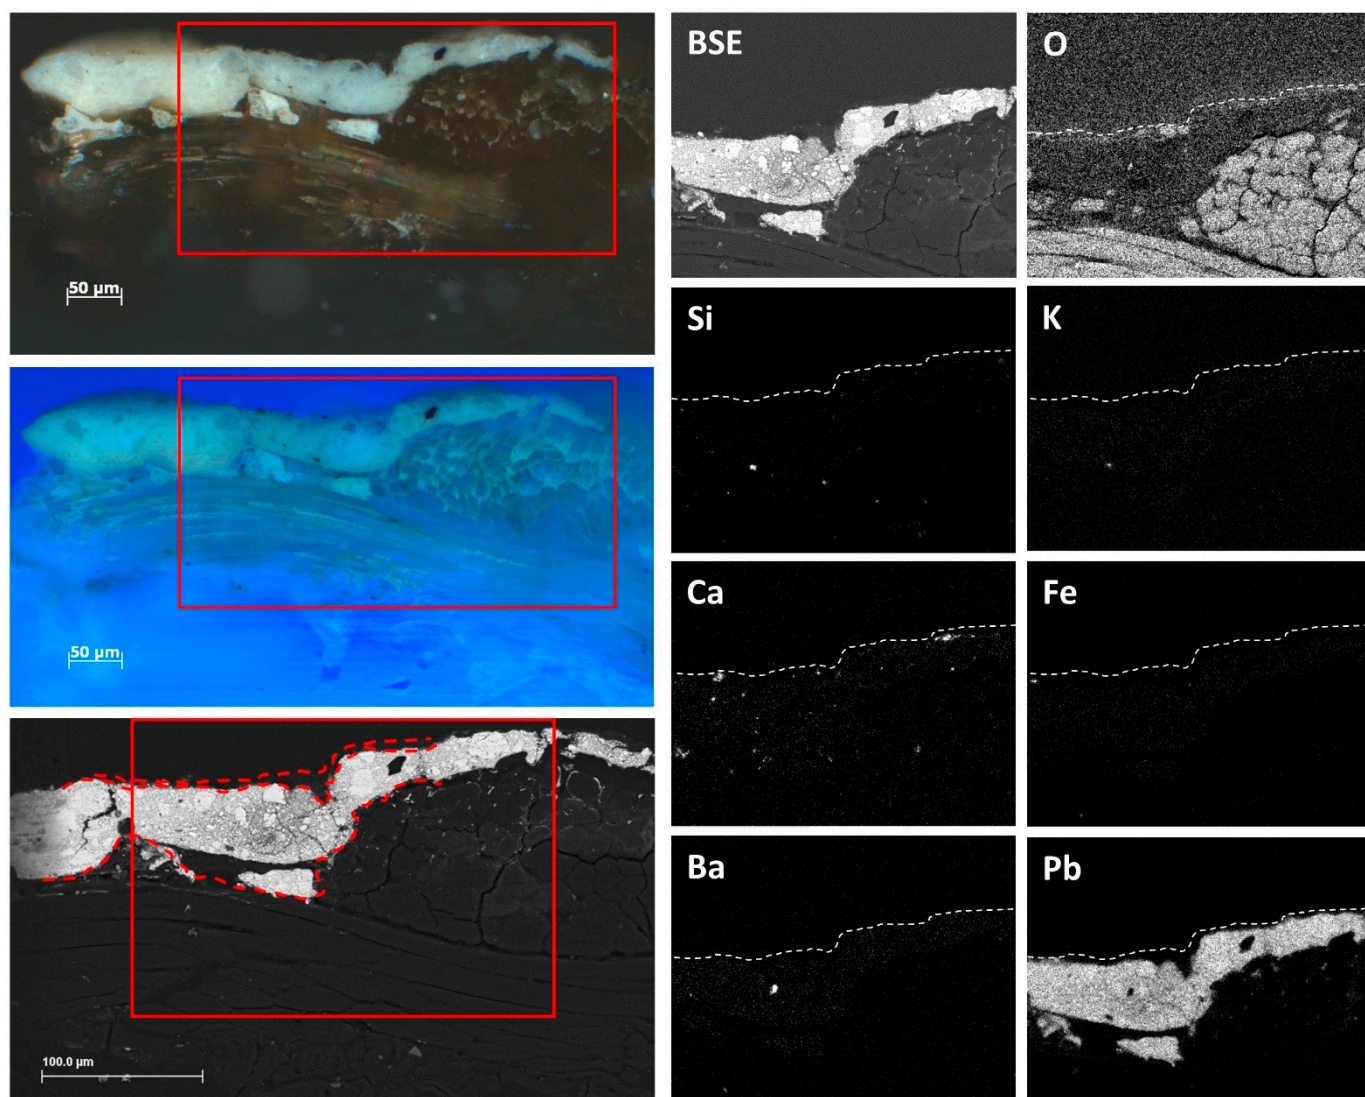

**Figure S6.** Optical microscopy and SEM/EDS data acquired on cross section S3.
